# Supplementary material for: Assessing China’s COVID-19 Control Measures: A Quantitative Analysis Based on A SIRD model
Source: Research Square preprint supplement (doi:10.21203/rs.3.rs-7853013/v1), 2025-11-19
Supplement: Supplementary file 1 [file d75950b9129e90a843f60aec.docx]

# Appendix

## Data source:

DATA of COVID_19: <https://app.powerbi.com/view?r=eyJrIjoiY2UyNmQ0MWQtYjdiZC00MmIyLWI5YmYtZmRiZWJkZDcyMDMwIiwidCI6ImY2MTBjMGI3LWJkMjQtNGIzOS04MTBiLTNkYzI4MGFmYjU5MCIsImMiOjh9>

China’s population at this URL: China Population (2025)-Worldometer:

<https://www.worldometers.info/world-population/china-population/?utm_campaign=Weekly%20Briefing&utm_source=hs_email&utm_medium=email&utm_content=368574456&_hsenc=p2ANqtz-9mJgA3nVtw5aN8jLeOYCxs3h1e2uuD1q8QJF3SVxSWrvdeBeOK9nQld1dNiyC18LvF2Slg3HAOMJvhkLai-lREJH4Dbg&_hsmi=368574456>

## Empirical Results:

### COVID-19 of Italian:

First, we download the data from the following URL into matlab, then clean and process the data, and then try to program it:

%Getting the official Italian outbreak data:

%url='https://raw.githubusercontent.com/pcm-dpc/COVID-19/master/dati-andamento-nazionale/dpc-covid19-ita-andamento-nazionale.csv';

**(1) When limiting the dataset to a short period of time, the model results do still roughly simulate the path and spread of the virus. Of course, we did not get too hung up on the degree of fit, but the trends and directions were still met, as shown below:**

Fig.15: Italy’s short-term data can barely have relevant trend results

**(2)** When we expanded the fitting interval to January 2025, the latest final dataset, we found that the fit was indeed poor and the trend effects were far apart. At the same time, we still want to emphasize that the counterfactual assessment in the model does in fact quantify the relaxation after the epidemic is prevented and controlled and shows that the epidemic would indeed rebound significantly. The downside is that unlike the multiple, multi-peak, multi-valley rebound trend in developed countries, which is laced with multiple factors, the rebound in our model is really just an idealistic rebound, i.e., there is only one big peak and valley until it eventually dies out.

In order to find the reasons behind the epidemic, we found that, unlike China’s epidemic, which developed under the “dynamic zero policy of strong intervention”, the national united front began at the early stage of the epidemic and actively took preventive and control measures, including social isolation, the establishment of the Vulcan Mountain Hospital, screening through regular scanning of the health code, normalization of nucleic acid, etc., until the end of the epidemic, the whole process almost did not experience a second wave of rebound, and the number of new infections gradually cleared in a total of six months. The whole process almost did not experience a second wave of rebound, a total of six months the number of new infections will gradually clear 0, the end of the epidemic.

Comparing with Italy, the epidemic in the first half of the year also experienced slow development and could be roughly simulated by SIRD, but unlike China, the epidemic experienced several rounds of rebound, so the data in the late stage could not be simulated by the SIRD model in this thesis for the following reasons: (1) Different cultural background: firstly, because of the late prevention and control, and then the governmental departments did not reach a consensus, and started to open the European Union for tourism from the intermittent prevention and control until June 2020, which led to the rebound of the epidemic after the semi-improvement in the tourism economy; (2) Mutation of the epidemic: along with the outbreak of global epidemics, a variety of mutated strains appeared, which exacerbated the spread of the virus; (3) The hedging game between the vaccination and the vaccination resulted in multiple rounds of rebound, i.e., multiple peaks and valleys, as shown in the Fig.16 below:

Fig. 16: Italy’s outbreak data bounced around so many times

Of course, although the simple model in this paper cannot portray the changes in the long term, we also try to think about a method of model correction here, in order to practically analyze and expand the public outbreak data with multiple rebounds like Italy in our future research work: that is, on this basic SIRD model, the influencing factors (such as mutation, relaxation of control) in the later stages of different time segments should be analyzed in a further refined way. Then, quantitative analysis of the influencing factors, such as the transmission rate may be faster because of mutation, at this time, it is necessary to make further corrections to the parameters of the transmission rate; and then according to the epidemic data to analyze the reasons for the rebound of the virus in each segment, the spread of the virus process of refinement of the analysis of the parameters of the transmission of the quantitative analysis of the function of the multi-segmentation of the model, and finally the model used for the fitting of the actual data, if there is a deviation and then make further corrections, and further corrections. And keep on correcting and analyzing until it can fit it completely in the basic trend. Of course, this work appears to be more systematic and refined, and we will spend more time to explore and study the related issues in our future work.

### COVID-19 of Brizal:

Next, we try to use our model to validate the Brazilian data as well. First, we downloaded the automatically updated data from the URL WHO, as shown in the following link:

<https://app.powerbi.com/view?r=eyJrIjoiY2UyNmQ0MWQtYjdiZC00MmIyLWI5YmYtZmRiZWJkZDcyMDMwIiwidCI6ImY2MTBjMGI3LWJkMjQtNGIzOS04MTBiLTNkYzI4MGFmYjU5MCIsImMiOjh9>

After observing and analyzing the data, we found that the weekly frequency of the Brazilian epidemic data was relatively complete, while the daily frequency data only had data on deaths and cumulative infections, and lacked data on recovery and being in an infected state, which made it impossible to analyze in detail. Therefore, we first choice the weekly frequency data. Through observation, the existing three known indicators of new cases per week, new deaths per week, and cumulative confirmed cases per week were extracted, and then the cumulative total cases per week and cumulative deaths per week were calculated based on the two indicators of new cases per week and new deaths per week. Thus, the weekly cumulative recovery cases were calculated based on the weekly cumulative confirmed cases, weekly cumulative cases, and weekly cumulative death cases (not in the same way as the Chinese statistics), and the weekly cumulative recovery cases were calculated based on the following formula:

**Cumulative weekly recovery cases = Cumulative weekly cases - Cumulative weekly confirmed cases - Cumulative weekly death cases**

The dataset spans from March 16, 2020 until July 14, 2025 when it ends. After observation of the data, we find that starting from March 16, 2020 and following the weekly frequency as a gradient, each indicator begins to have complete and reasonable data, and then continues until August 2, 2021 when the end of each sub-dataset is complete. From August 2, 2021 until December 23, 2024 the cumulative number of confirmed cases lacks statistical data and is null; then from December 23, 2024 onwards until July 14, 2015, the latest point in the data update, there are recorded data on outbreaks. The other indicators also have some intermittent stops recorded in between. Overall, only the weekly cumulative deaths, weekly cumulative confirmed cases, and weekly cumulative recoveries are complete data from start to finish. At the same time, because the sub-indicator stops and records are not exactly the same time, so the blank data can't be recorded out by direct record, and what we use directly in the text is the original data for preliminary analysis and fitting.

To ensure accuracy, we chose to fit the model and analyze the data from April 20, 2020 until the cutoff date of the data. Through the fitting, we found that the model does simulate the overall indicator trend of the virus in a relatively coarse manner, although the degree of fit to the data is not considered, and the results are as follows:

Fig. 17: A rough trend to fit to the Covid-19 data from Brazil

Meanwhile, we analyzed the reason behind, i.e., why the model could not fit the Italian data but could roughly fit the Brazilian data? The main reasons are as follows: (1)Change of attitude towards prevention and control: at the beginning of the virus development stage, some officials were still against the countermeasures of uniform isolation and keeping social distance, but with the rampant development of the epidemic, and at the same time, after China has achieved remarkable results in the prevention and control of the epidemic, Brazil started to imitate the Chinese preventive and control measures, and there are even some reports mentioning why China found the virus earlier but still managed to control the epidemic very quickly, because China is more concerned about people’s lives than economy, i.e., Brazil at least partly imitated China’s epidemic prevention and control methods, resulting in a limited rebound of the epidemic, i.e., the two have in common that they reduce the trend of the epidemic curve by lowering the rate of population contact. (2) In the process of epidemic prevention and control, there are actually some mutations in Brazil, but the number of people infected with mutations is still relatively small, which leads to no qualitative change in the transmission capacity and pathogenicity of the virus, and therefore can play the same role of fitting the trend to the Brazilian data. (3) From the analysis of the trend of infection data (the number of people corresponding to the infection status, i.e., neither death nor recovery) itself, it can be seen that it has experienced a rebound in the middle, but why it can still be fitted, the reason is that despite the fluctuations in the middle of the many times, but the overall trend is still presenting the process of rising and then declining, presenting a roughly inverted U-shape, as shown in the figure below, which is very similar to the spread of China’s outbreaks still, compared to Italy, where the magnitude and number of bounces are still very low.

<https://k.sina.cn/article_3164957712_bca56c10020015u17.html?from=news&subch=onews>

Fig. 18: The trend of epidemic data in Brazil
